# Supplementary material
Source: PubMed Central journal article supplement (PMC4871264)

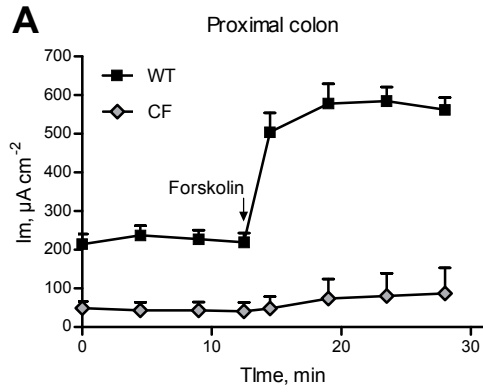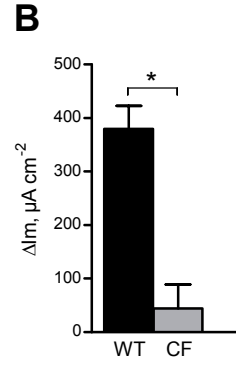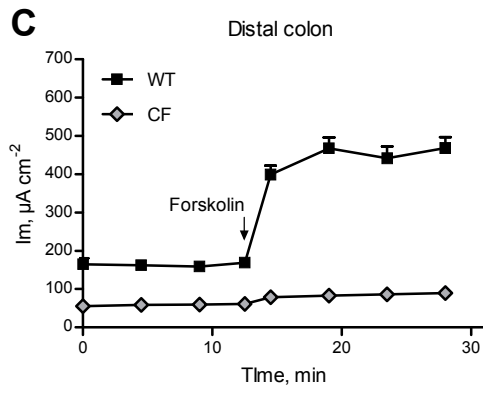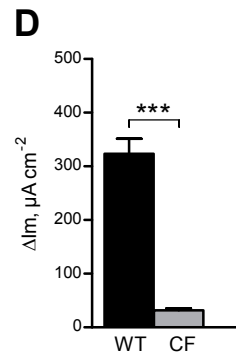

Supplement: NIHMS478692-supplement-S1.pdf [file NIHMS478692-supplement-S1.pdf]

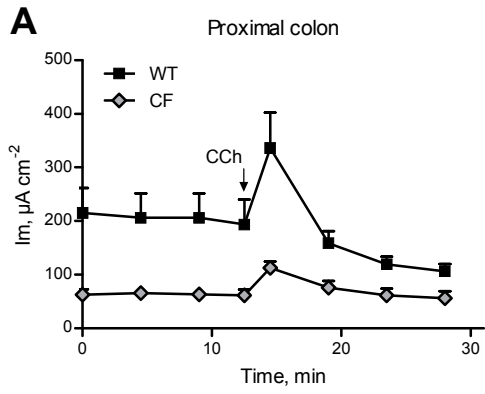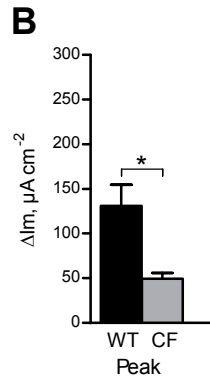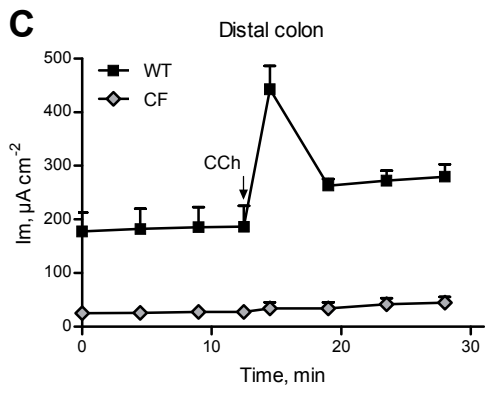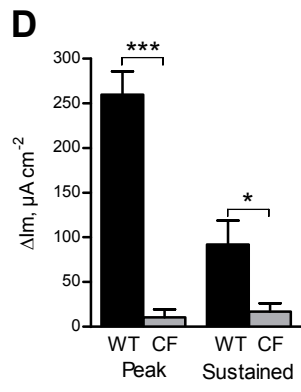

Supplement: NIHMS478692-supplement-S2.pdf [file NIHMS478692-supplement-S2.pdf]
